# Supplementary material for: Sulfur isotope fractionation during incorporation of sulfur nucleophiles into organic compounds
Source: Royal Society of Chemistry journal article supplement (doi:10.1039/b717113g), 2008-01-01
Supplement: b717113g.pdf [file b717113g.pdf]

# Sulfur isotope fractionation during sulfur nucleophiles incorporation into organic compounds

Alon Amrani<sup>a\*</sup>, Qisheng Ma<sup>a</sup>, Ward Said Ahmad<sup>b</sup>, Zeev Aizenshtat<sup>b</sup> Yongchun Tang<sup>a</sup>

<sup>a</sup> Address, Chemistry and Chemical Engineering Division, California Institute of Technology, CA 91125, USA. Fax: 626-683-0621; Tel:626-395-6271; E-mail: aamrani@caltech.edu

<sup>b</sup> Address, The Chemistry Institute, Hebrew University, Jerusalem 91904, Israel.

## Supplementary data

### 1. Chemicals

All chemicals were analytical grade and purchase from Aldrich or Merck and used without further purification.

### 2. Reaction between H<sub>2</sub>S/CH<sub>3</sub>SNa and organic model compounds

Method A (H<sub>2</sub>S). Solution prepared by addition of 2g of NaHCO<sub>3</sub> into 30ml distilled water in a two necks round flask equipped with valves. Argon bubbled through the solution for 1 hour to remove O<sub>2</sub> and then H<sub>2</sub>S bubbled through the solution for 2 hours. Sample of the solution were taken by syringe trough septum to determine the initial value of the  $\delta^{34}\text{S}$  of the solution and the concentration of S (20-40mmol) by precipitation with 5 wt% Ag<sub>2</sub>NO<sub>3</sub> .solution. The organic substrate (0.5mmol) was introduced through septum and the reaction begins. The pH of the solutions was in the range of 8 to 9. Reactions stopped after 3 days, extracted 3 times with CH<sub>2</sub>Cl<sub>2</sub>, dried with Na<sub>2</sub>SO<sub>4</sub>, filtered and carefully evaporated under gentle N<sub>2</sub> stream.

Method B (Na<sub>2</sub>S). Stock solution of 0.3M SH<sup>-</sup> were prepared as followed: Into 300ml of distilled water 8.2g NaHCO<sub>3</sub> was added. The solution bubbled 2 hours with argon, sealed, and introduced into anaerobic glovebox. Solid crystals of Na<sub>2</sub>S 9H<sub>2</sub>O (32g) were added and to the solution and the pH adjusted to 8.5-9 by addition of concentrated HCl solution. The solution then added into the reaction vials (each 15 ml) and sealed with cups equipped with Teflon septum. The organic model

compounds were injected into the vials through the Teflon septum and the reaction begins. The vials were shaken using automatic shaker for three weeks, extracted 3 times with  $\text{CH}_2\text{Cl}_2$ , dried with  $\text{Na}_2\text{SO}_4$ , filtered and carefully evaporated under gentle  $\text{N}_2$  stream.

Method C ( $\text{CH}_3\text{SNa}$ ). Into a 15 ml vial equipped with magnetic stirrer, 100mg (1.4mmol) of  $\text{CH}_3\text{SNa}$  powder were introduced and dissolved in 5ml of distilled water. The pH adjusted to  $\sim 9$  by slow addition of concentrated HCl solution and distilled water was added to reach 10ml of total volume. Organic substrate (0.2 mmol) then introduced and the vial sealed under  $\text{N}_2$  atmosphere. Reactions stopped after 10-14 days, extracted 3 times with  $\text{CH}_2\text{Cl}_2$ , dried with  $\text{Na}_2\text{SO}_4$ , filtered and carefully evaporated under gentle  $\text{N}_2$  stream.

### *3. Polysulfides ( $\text{S}_x^{2-}$ ) reactions with organic substrates*

Preparation of polysulfide solutions: General procedure: 0.94g (29mmol) of elemental sulfur was dissolved in 10 ml of ammonium sulfide solution ( $(\text{NH}_4)_2\text{S}$ , 20% w/w in water, Merck) to give a stoichiometric ratio of sulfide to elemental sulfur of 1:1. The pH buffered by the ammonium solution to 8.5-9.0.  $\text{Na}_2\text{S}_x$  was prepared by dissolving 6.96g  $\text{Na}_2\text{S}\cdot 9\text{H}_2\text{O}$  (29mmol, Merck) in 10ml distilled water and adding of 0.94g elemental sulfur (29mmol). The pH was reduced to 8.5 by addition of diluted HCl.

General procedure (aqueous conditions) : Into a round bottom flask, 10-20 ml polysulfides solution were introduced (concentration of polysulfides 0.3-3 Molar ; pH= 8.5-9) with 1.6mmol organic substrate. The solution was magnetically stirred overnight under nitrogen atmosphere at  $25^\circ\text{C}$ . The aquatic solution was extracted

three times with dichloromethane ( $\text{CH}_2\text{Cl}_2$ ). The organic solution was dried over anhydrous  $\text{MgSO}_4$  and filtered. Elemental sulfur was removed from the organic extracts by reaction with activated copper curls and subsequent filtration. The extracts were evaporated at ambient temperature, and weighed.

General procedure under Phase Transfer catalysis (PTC) conditions: Into a round bottom flask, ~200 mg organic substrate and 20mg dimethyldidecylammonium-bromide (DDAB) were introduced and dissolved in 10ml toluene. One g of elemental sulfur was dissolved in 10 ml of ammonium sulfide (Merck). The mixture of the two liquids was magnetically stirred at ambient temperature under  $\text{N}_2$ . The aqueous layer was removed and the organic layer was repeatedly washed with saturated NaCl solution until the washing was colorless, dried over  $\text{MgSO}_4$  and filtered. Elemental sulfur was removed from the extracts by reaction with activated Cu turnings and subsequent filtration. The extracts were evaporated under vacuum at ambient temperature. The residue was analyzed by GC (FID and FPD), GC-MS, and subjected to elemental analysis.

#### *Gas chromatography and mass spectroscopy*

GC-MS analyses were carried out on an HP 5890 II gas chromatograph directly coupled to the source of a HP-G-1800B quadrupole mass-spectrometer. The mass-spectrometer was run in the electron impact (EI) mode with electron energy at 70 eV, source temperature at 200 °C, mass range 45-450 Da, a resolution of 800 and scan time of 1s. A fused capillary column (silica 30m X 0.32mm, ID 0.25 $\mu$ , and CP-SIL 24CB coating) was used with He as the carrier gas. The GC was programmed at 4

°C/min between 50 and 300 °C. The initial and final temperatures were maintained for 5 and 20 min, respectively.

#### 4. Isotopic ratio measurements

The  $\delta^{34}\text{S}$  of the precipitated  $\text{Ag}_2\text{S}$  and the organic samples was measured by a continuous-flow elemental analyzer connected to a Finnigan Delta Plus stable-isotope ratio monitoring mass spectrometer (EA-irmMS). Sulfur isotope compositions are expressed as per mil (‰) deviations from V-CDT (Vienna Canyon Diablo Troilite) standard using the conventional delta notation with a standard deviation better than 0.3‰ ( $n \geq 2$ ). The measurements were directly calibrated against sulfur isotopic standards IAEA-S-1 ( $\text{Ag}_2\text{S}$ , -0.3‰) and NBS-127 ( $\text{BaSO}_4$ , +20.3‰) with a standard deviation better than 0.2‰ ( $n \geq 3$ ).

#### 5. Molecular modeling

##### 5.1 The delta-G method to determine isotope exchanges

The thermal equilibrium of the isotopic exchange is governed by:

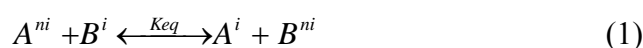

where  $A^i$ ,  $A^{ni}$ ,  $B^i$ , and  $B^{ni}$  are the concentrations of the isotopic and non-isotopic species of molecular compounds A and B, and  $K_{eq}$  is the thermal equilibrium constant.

Therefore we have:

$$K_{eq} = \frac{A^i * B^{ni}}{A^{ni} * B^i} = \frac{A^i}{A^{ni}} / \frac{B^i}{B^{ni}} \quad (2)$$

According to the definition of the standard isotope fractionation, we have:

$$\begin{aligned} \delta^{34}S_A &= [R_A / R_0 - 1] * 1000 \\ \delta^{34}S_B &= [R_B / R_0 - 1] * 1000 \end{aligned} \quad (3)$$

where  $R_A = A^i/A^{ni}$ ,  $R_B = B^i/B^{ni}$ , and  $R_0$  is the ratio of isotopic and non-isotopic concentrations of the standard sample. So:

$$R_A = \left[ \frac{\delta^{34}S_A}{1000} + 1 \right] * R_0; R_B = \left[ \frac{\delta^{34}S_B}{1000} + 1 \right] * R_0 \quad (4)$$

Substituting equations (4) into equation (2), we have:

$$K_{eq} = \frac{\delta^{34}S_A + 1000}{\delta^{34}S_B + 1000} \quad (5)$$

Therefore, the isotope fractionation difference between compounds A and B is:

$$\begin{aligned} & \Delta\{\delta^{34}S_A - \delta^{34}S_B\} \\ &= ((\delta^{34}S_B + 1000)K_{eq} - 1000) - \delta^{34}S_B \\ &= (K_{eq} - 1)(\delta^{34}S_B + 1000) \\ &\approx (K_{eq} - 1) * 1000 \end{aligned} \quad (6)$$

The approximation made in the last step is because  $\delta^{34}S \ll 1000$ .

Since the thermal equilibrium constant  $K_{eq}$  is related to the Gibbs' free energy difference of compounds A and B,  $\Delta\Delta G = \Delta G(B) - \Delta G(A)$ , we have:

$$\Delta\{\delta^{34}S_A - \delta^{34}S_B\} = 1000 * (e^{-\Delta\Delta G/RT} - 1) \quad (7)$$

## 5.2 First-principle Quantum Mechanics calculations to determine $\Delta\Delta G$

Within the Density Functional Theory (DFT) framework, the Gibbs' free energy  $\Delta G$  is evaluated from several individual terms as:

$$\Delta G = E_0 + ZPE + \delta G(T) \quad (8)$$

where  $E_0$  is the total electronic energy at temperature  $T = 0$  K, ZPE is the Zero-Point Energy due to the quantum mechanics vibrational motion, and  $\delta G(T) = \delta H(T) - T\delta S(T)$  is the Gibbs free energy change from temperature  $T = 0$  to  $T$  K, and the  $\delta H(T)$  and  $\delta S(T)$  are the enthalpy and entropy changes from temperature  $T = 0$  to  $T$  K.

In general, the total Gibbs free energy is contributed from several different molecular motions, namely electronic, translational, vibrational and rotational. The

biggest contribution from the electronic motion  $E_0$  remains unchanged for both the isotopic and non-isotopic complexes such that the majority of the Gibbs' free energies for both cases cancelled each other. The individual energy terms from different motions can be evaluated as follows:

#### Contribution from the translation motion

The partition function for the translational motion at temperature T is defined as:

$$Q_{t,T} = \left( \frac{2\pi mk_B T}{h^2} \right)^{3/2} \frac{k_B T}{P} \quad (9)$$

where  $P = 1$  atm is the pressure under the standard condition.

Using the Stirling's approximation, the enthalpy and entropy changes due to the translational motion are:

$$H_{t,T} = \frac{3}{2} RT, \quad S_{t,T} = R \left( \ln Q_{t,T} + \frac{5}{2} \right) \quad (10)$$

Therefore, for different isotopomers with different molecular mass  $m$ , the entropic contribution  $S_{t,T}$  will be different.

#### Contributions from the vibrational motion

Vibrational motions have contributions to both ZPE and  $\Delta G$  energy terms. The ZPE is calculated from:

$$ZPE = \sum_i \frac{1}{2} h\nu_i \quad (11)$$

where  $\nu_i$  are the calculated vibrational frequencies of normal vibrational modes.

The partition function of vibrational motion at temperature T is defined as:

$$Q_{v,T} = \prod_i \frac{e^{-\Theta_{v,i}/2T}}{1 - e^{-\Theta_{v,i}/T}} \quad (12)$$

where  $\Theta_{v,i} = h\nu_i/k_B$  is the  $i^{\text{th}}$  vibrational temperature (in unit of K),  $h$  and  $k_B$  are the Planck's and Boltzmann constants.

The vibrational enthalpy and entropy contributions are calculated from:

$$H_{v,T} = R \sum_i \frac{\Theta_{v,i}}{e^{\Theta_{v,i}/T} - 1}, S_{v,T} = R \sum_i \left\{ \frac{\Theta_{v,i}/T}{e^{\Theta_{v,i}/T} - 1} - \ln(1 - e^{-\Theta_{v,i}/T}) \right\} \quad (13)$$

### Contributions from the rotational motion

The partition function of the rotational motion at temperature T is defined as:

$$Q_{r,T} = \frac{\pi^{1/2}}{\sigma_r} \left\{ \frac{T^{3/2}}{(\Theta_{r,x} \Theta_{r,y} \Theta_{r,z})^{1/2}} \right\} \quad (14)$$

where  $\Theta_{r,x} = h^2/(8\pi k_B I_x)$ ,  $\Theta_{r,y} = h^2/(8\pi k_B I_y)$ ,  $\Theta_{r,z} = h^2/(8\pi k_B I_z)$  are the x-, y- and z-components of rotational temperature,  $I_x$ ,  $I_y$ , and  $I_z$  are the x-, y- and z- components of the principal moment of inertia, and  $\sigma_r$  is the rotational symmetry number. And the rotational enthalpy and entropy contributions are calculated from:

$$H_{r,T} = 2RT \quad (15)$$

$$S_{r,T} = R \left( \ln Q_{r,T} + \frac{3}{2} \right) = R \left\{ \frac{3}{2} \ln T + \ln \frac{\pi^{1/2}}{\sigma_r (\Theta_{r,x} \Theta_{r,y} \Theta_{r,z})^{1/2}} + \frac{3}{2} \right\} \quad (16)$$

### 5.3 Quantum Mechanics Density Functional Theory (DFT) calculations

Molecular geometry in gas-phase is fully optimized at the DFT/B3LYP/6-31G\*\* level to determine the electronic energy E0. Thermodynamic calculations are then performed to determine the individual contributions of enthalpy and entropy terms. All calculations are carried out using the commercially computational software package Jaguar 5.5 version 11 (Jaguar 5.5; Schrodinger, Inc., Portland, OR, 2005)

To ensure the higher computational accuracy needed for the small isotopic changes, we recalculated the energy terms by a MATLAB program according to above equations instead of directly taking the computational outputs.

### 6. Complete isotopic data

Table 1S: Experimental measurements of  $^{34}\text{S}$  enrichment (‰) in sulfurized products of reactions between S nucleophiles and organic substrates under aqueous conditions.

| Precursor compound     | Reactant/method         | Initial $\delta^{34}\text{S}$ value of reactant | $\delta^{34}\text{S}$ value of sulfurized products | $\Delta^{34}\text{S}$ |
|------------------------|-------------------------|-------------------------------------------------|----------------------------------------------------|-----------------------|
| Citral (+ammonium)     | $\text{CH}_3\text{SNa}$ | -4.9                                            | -1.2                                               | 3.7                   |
| Citral                 | $\text{CH}_3\text{SNa}$ | -4.9                                            | -1.8                                               | 3.1                   |
| <i>Trans</i> 2-octenal | $\text{CH}_3\text{SNa}$ | -4.9                                            | -1.4                                               | 3.5                   |
| Octanal (+ammonium)    | $\text{CH}_3\text{SNa}$ | -4.9                                            | -0.5                                               | 4.4                   |
| Octanal                | $\text{CH}_3\text{SNa}$ | -4.9                                            | 0.5                                                | 5.4                   |
| <i>Trans</i> 2-octenal | $\text{H}_2\text{S}$    | 12.9                                            | 17.7                                               | 4.8                   |
| Butanal                | $\text{H}_2\text{S}$    | 12.6                                            | 19.9                                               | 7.3                   |
| <i>Trans</i> 2-octenal | $\text{Na}_2\text{S}$   | -1.8                                            | 2.7                                                | 4.5                   |
| Trans 2,4-heptadienal  | $\text{Na}_2\text{S}$   | -1.8                                            | 3.0                                                | 4.8                   |
| Octanal                | $\text{Na}_2\text{S}$   | -1.8                                            | 5.3                                                | 7.1                   |
| Butanal                | $\text{Na}_2\text{S}$   | -1.8                                            | 6.3                                                | 8.1                   |
| 1-bromobutan           | $\text{Na}_2\text{S}$   | -1.8                                            | -4.3                                               | -2.5                  |

Table 3S. Experimental measurements of  $^{34}\text{S}$  enrichment (‰) in the sulfurized products of the reactions between polysulfide anions ( $\text{S}_x^{2-}$ ) and organic substrates under PTC conditions.

| Precursor         | Reactant                    | Method         | Initial $\delta^{34}\text{S}$ value of Total S in solution | $\delta^{34}\text{S}$ value of sulfurized products | $\Delta^{34}\text{S}$ |
|-------------------|-----------------------------|----------------|------------------------------------------------------------|----------------------------------------------------|-----------------------|
| Citral            | $(\text{NH}_4)_2\text{S}_x$ | Water          | 2.8                                                        | 7.2                                                | 4.4                   |
| Citral            | $(\text{NH}_4)_2\text{S}_x$ | PTC            | 2.8                                                        | 8.9                                                | 6.1                   |
| Geranyl bromide   | $(\text{NH}_4)_2\text{S}_x$ | Water          | 2.8                                                        | 3.9                                                | 1.1                   |
| Geranyl bromide   | $(\text{NH}_4)_2\text{S}_x$ | PTC            | 2.8                                                        | 6.6                                                | 3.8                   |
| 1,2-dibromohexane | $(\text{NH}_4)_2\text{S}_x$ | Water          | 2.8                                                        | 2.9                                                | 0.1                   |
| 1,2-dibromohexane | $(\text{NH}_4)_2\text{S}_x$ | PTC            | 2.8                                                        | 5.1                                                | 2.3                   |
| 1-chlorooctane    | $(\text{NH}_4)_2\text{S}_x$ | Water/methanol | 2.8                                                        | 3.8                                                | 1                     |
| 1-chlorooctane    | $(\text{NH}_4)_2\text{S}_x$ | PTC            | 2.8                                                        | 7.2                                                | 3.4                   |



Table 2S. Molecular modeling prediction of the  $^{34}\text{S}$  enrichment (%) of S containing molecules in equilibrium with S nucleophiles at 20°C.

| Molecule                                                                                | $E_0$        | $E_0$      | ZPE        | $E_{\text{sol}}$ | $\delta G_{T=20\text{C}}$ | $\Delta G_{T=20\text{C}}$ | $\Delta\Delta G$ | $\delta(\Delta\Delta G)$ | $^{34}\text{K}_{\text{eq}}/^{32}\text{K}_{\text{eq}}$ | $\Delta^{34}\text{S}$ |
|-----------------------------------------------------------------------------------------|--------------|------------|------------|------------------|---------------------------|---------------------------|------------------|--------------------------|-------------------------------------------------------|-----------------------|
|                                                                                         | (Hartree)    | (kcal/mol) | (kcal/mol) | (kcal/mol)       | (kcal/mol)                | (kcal/mol)                | (kcal/mol)       | (cal/mol)                |                                                       | (‰)                   |
| <b>Reactants</b>                                                                        |              |            |            |                  |                           |                           |                  |                          |                                                       |                       |
| H <sub>2</sub> S                                                                        |              |            | 9.1000     | -2.8494          | -12.0684                  | -250621.88                |                  |                          |                                                       |                       |
| H <sub>2</sub> <sup>34</sup> S                                                          | -399.382097  | -250616.06 | 9.0917     |                  | -12.1198                  | -250621.94                | -0.060           |                          |                                                       |                       |
| CH <sub>3</sub> SH                                                                      |              |            | 29.0792    | -1.5319          | -14.9966                  | -275264.22                |                  |                          |                                                       |                       |
| CH <sub>3</sub> <sup>34</sup> SH                                                        | -438.681441  | -275276.77 | 29.0641    |                  | -15.0431                  | -275264.28                | -0.062           |                          |                                                       |                       |
| <b>Products</b>                                                                         |              |            |            |                  |                           |                           |                  |                          |                                                       |                       |
| CH <sub>2</sub> =CHSCH <sub>3</sub>                                                     | -516.057999  | -323831.30 | 53.3580    | -1.6660          | -17.9493                  | -323797.55                | -0.065           | -2.9                     | 1.0050                                                | <b>5</b>              |
| CH <sub>2</sub> =CH <sup>34</sup> SCH <sub>3</sub>                                      |              |            | 53.3321    |                  | -17.9879                  | -323797.62                |                  |                          |                                                       |                       |
| CH <sub>3</sub> CH <sub>2</sub> SCH <sub>3</sub>                                        |              |            | 66.7746    | -1.1254          | -18.1465                  | -324555.21                | -0.064           | -2.0                     | 1.0034                                                | <b>3.4</b>            |
| CH <sub>3</sub> CH <sub>2</sub> <sup>34</sup> SCH <sub>3</sub>                          | -517.287323  | -324602.71 | 66.7494    |                  | -18.1849                  | -324555.27                |                  |                          |                                                       |                       |
| CH <sub>3</sub> CH(SCH <sub>3</sub> )(SCH <sub>3</sub> )                                | -954.765593  | -599124.48 | 85.5489    | -2.7840          | -21.1134                  | -599062.83                | -0.063           | -1.6                     | 1.0028                                                | <b>2.8</b>            |
| CH <sub>3</sub> CH( <sup>34</sup> SCH <sub>3</sub> )(SCH <sub>3</sub> )                 |              |            | 85.5208    |                  | -21.1485                  | -599062.89                |                  |                          |                                                       |                       |
| CH <sub>3</sub> CH(SCH <sub>3</sub> )CH <sub>2</sub> CH=O                               | -669.883729  | -420358.40 | 90.9038    | -6.3512          | -20.9909                  | -420294.84                | -0.062           | -0.9                     | 1.0015                                                | <b>1.5</b>            |
| CH <sub>3</sub> CH( <sup>34</sup> SCH <sub>3</sub> )CH <sub>2</sub> CH=O                |              |            | 90.8768    |                  | -21.0264                  | -420294.90                |                  |                          |                                                       |                       |
| CH <sub>2</sub> (SCH <sub>3</sub> )(OH)                                                 | -553.180617  | -347126.09 | 51.5188    | -8.4935          | -17.8946                  | -347100.96                | -0.064           | -2.0                     | 1.0034                                                | <b>3.4</b>            |
| CH <sub>2</sub> ( <sup>34</sup> SCH <sub>3</sub> )(OH)                                  |              |            | 51.4936    |                  | -17.9330                  | -347101.03                |                  |                          |                                                       |                       |
| CH <sub>3</sub> CH <sub>2</sub> (SCH <sub>3</sub> )CH <sub>2</sub> -CHOH                | -669.867978  | -420348.52 | 92.2269    | -9.7620          | -21.0663                  | -420287.12                | -0.063           | -1.7                     | 1.0029                                                | <b>2.9</b>            |
| CH <sub>3</sub> CH <sub>2</sub> ( <sup>34</sup> SCH <sub>3</sub> )CH <sub>2</sub> -CHOH |              |            | 92.1989    |                  | -21.1016                  | -420287.18                |                  |                          |                                                       |                       |
| CH <sub>2</sub> =CHSH                                                                   | -476.757231  | -299169.69 | 33.9384    | -1.2924          | -16.0790                  | -299153.12                | -0.063           | -3.5                     | 1.0060                                                | <b>6.0</b>            |
| CH <sub>2</sub> =CH <sup>34</sup> SH                                                    |              |            | 33.9191    |                  | -16.1229                  | -299153.19                |                  |                          |                                                       |                       |
| CH <sub>3</sub> CH <sub>2</sub> SH                                                      |              |            | 47.3734    | -1.6891          | -16.4041                  | -299912.00                | -0.061           | -1.8                     | 1.0031                                                | <b>3.1</b>            |
| CH <sub>3</sub> CH <sub>2</sub> <sup>34</sup> SH                                        | -477.986832  | -299941.28 | 47.3559    |                  | -16.4481                  | -299912.06                |                  |                          |                                                       |                       |
| CH <sub>3</sub> CH(SH)(SH)                                                              | -876.165787  | -549802.36 | 46.7453    | -4.1834          | -18.3455                  | -549778.14                | -0.062           | -2.2                     | 1.0038                                                | <b>3.8</b>            |
| CH <sub>3</sub> CH( <sup>34</sup> SH)(SH)                                               |              |            | 46.7244    |                  | -18.3865                  | -549778.20                |                  |                          |                                                       |                       |
| CH <sub>3</sub> CH(SH)CH <sub>2</sub> CH=O                                              | -630.581658  | -395695.98 | 71.5898    | -4.1834          | -19.9076                  | -395648.48                | -0.063           | -2.8                     | 1.0048                                                | <b>4.8</b>            |
| CH <sub>3</sub> CH( <sup>34</sup> SH)CH <sub>2</sub> CH=O                               |              |            | 71.5678    |                  | -19.9481                  | -395648.54                |                  |                          |                                                       |                       |
| CH <sub>2</sub> (SH)(OH)                                                                | -513.878789  | -322463.82 | 32.2836    | -9.5393          | -16.1500                  | -322457.23                | -0.062           | -1.9                     | 1.0033                                                | <b>3.3</b>            |
| CH <sub>2</sub> ( <sup>34</sup> SH)(OH)                                                 |              |            | 32.2660    |                  | -16.1940                  | -322457.29                |                  |                          |                                                       |                       |
| CH <sub>3</sub> CH <sub>2</sub> (SH)CH <sub>2</sub> CHOH                                | -630.570082  | -395688.72 | 72.9170    | -9.2890          | -19.6359                  | -395644.72                | -0.061           | -1.5                     | 1.0026                                                | <b>2.6</b>            |
| CH <sub>3</sub> CH <sub>2</sub> ( <sup>34</sup> SH)CH <sub>2</sub> CHOH                 |              |            | 72.8967    |                  | -19.6768                  | -395644.79                |                  |                          |                                                       |                       |
| CH <sub>2</sub> =S                                                                      | -437.452683  | -274505.71 | 16.3534    | -0.5393          | -13.7579                  | -274503.66                | -0.065           | -5.5                     | 1.0095                                                | <b>9.5</b>            |
| CH <sub>2</sub> = <sup>34</sup> S                                                       |              |            | 16.3355    |                  | -13.8052                  | -274503.72                |                  |                          |                                                       |                       |
| CH <sub>3</sub> SSSCH <sub>3</sub>                                                      | -1274.361253 | -799673.79 | 50.3685    | -0.8509          | -21.6532                  | -799645.93                | -0.060           | -0.5                     | 1.0009                                                | <b>0.9</b>            |
| CH <sub>3</sub> S <sup>34</sup> SSCH <sub>3</sub>                                       |              |            | 50.3431    |                  | -21.6880                  | -799645.99                |                  |                          |                                                       |                       |

The optimized coordinates of all compounds studied:

**H<sub>2</sub>S**

| atom | x           | y             | z            |
|------|-------------|---------------|--------------|
| H1   | .0000000000 | 1.0125270727  | .8791276258  |
| S1   | .0000000000 | .0000000000   | -.0554238001 |
| H2   | .0000000000 | -1.0125270727 | .8791276258  |

**CH<sub>3</sub>SH**

| atom | x             | y            | z            |
|------|---------------|--------------|--------------|
| H1   | .3740093890   | 1.6936178770 | -.9051015852 |
| C1   | -.0950155038  | 1.2823372879 | .0000000000  |
| H2   | .3740093890   | 1.6936178770 | .9051015852  |
| S1   | .0053428302   | -.6135267425 | .0000000000  |
| H4   | -1.1678723009 | 1.5216895111 | .0000000000  |
| H3   | 1.3816918074  | -.7140771607 | .0000000000  |

**CH<sub>2</sub>=CHSCH<sub>3</sub>**

| atom | x            | y             | z            |
|------|--------------|---------------|--------------|
| H1   | -.8859396321 | 2.5339982540  | .0000000000  |
| C1   | .1646530493  | 2.2262950882  | .0000000000  |
| H7   | 1.2313318742 | -1.8668339662 | .9063575511  |
| C2   | .5418554469  | .9420365120   | .0000000000  |
| H4   | .9161481551  | 3.0215630265  | .0000000000  |
| S1   | -.6226223441 | -.4659769431  | .0000000000  |
| H5   | 1.5968336950 | .6511793790   | .0000000000  |
| H8   | 1.2313318742 | -1.8668339662 | -.9063575511 |
| C3   | .6085211357  | -1.8979702215 | .0000000000  |
| H3   | .0044273256  | -2.8164743776 | .0000000000  |

**CH<sub>3</sub>CH<sub>2</sub>SCH<sub>3</sub>**

| atom | x             | y             | z             |
|------|---------------|---------------|---------------|
| H1   | -.6086169609  | 1.4406032231  | -1.5773793454 |
| C1   | -.5913022379  | 1.4224460586  | -.4742056422  |
| H2   | .4454855615   | 1.6126303410  | -.1454735747  |
| C2   | -1.1249867981 | .0960676036   | .0614827695   |
| H4   | -1.2142460962 | 2.2594822343  | -.1053065444  |
| S1   | -.1748192360  | -1.4338912649 | -.5550787406  |
| H5   | -2.1578965557 | -.0849431230  | -.2779766601  |
| H6   | -1.1217846640 | .0660504428   | 1.1644659005  |
| C3   | 1.4325218120  | -1.2462980602 | .4192725019   |
| H3   | 2.0451205458  | -2.1259987252 | .1716259273   |
| H7   | 1.2240975528  | -1.2380656205 | 1.5007978805  |
| H8   | 1.9710610174  | -.3340551958  | .1223108590   |

**CH<sub>3</sub>CH(SCH<sub>3</sub>)(SCH<sub>3</sub>)**

| atom | x            | y            | z             |
|------|--------------|--------------|---------------|
| H1   | -.9155232907 | -.9517558424 | -2.0497057551 |
| C1   | -.7366009147 | .0046121672  | -1.5254709008 |

|     |               |               |               |
|-----|---------------|---------------|---------------|
| H2  | .3491074784   | .1985244866   | -1.5175791402 |
| C2  | -1.3307670555 | -.0342712183  | -.1219773552  |
| H4  | -1.2168309143 | .8121762002   | -2.1038572486 |
| S1  | -.7663267317  | -1.5249548833 | .9257084765   |
| H5  | -2.4205753045 | -.1782907498  | -.1751099654  |
| S2  | -1.2042776189 | 1.6365230501  | .7883829571   |
| C3  | .9714350418   | -1.9029012683 | .2826056639   |
| C4  | .6118962858   | 1.6809519519  | 1.2866982099  |
| H3  | 1.3113140294  | -2.7575842862 | .8870929317   |
| H7  | 1.6539230347  | -1.0552596916 | .4377432960   |
| H8  | .9484963855   | -2.1946697408 | -.7768090327  |
| H6  | 1.2712708947  | 1.6836065897  | .4057161851   |
| H9  | .8325023011   | .8302333244   | 1.9484161046  |
| H10 | .7440101376   | 2.6221143540  | 1.8411470439  |

### CH<sub>3</sub>CH(SCH<sub>3</sub>)CH<sub>2</sub>CH=O

| atom | x             | y             | z             |
|------|---------------|---------------|---------------|
| S1   | -.7506622260  | .7393829173   | -1.0719571172 |
| C1   | -.0447212956  | .1165805777   | .6084810649   |
| H2   | 1.0500342934  | .1977515111   | .5114205738   |
| C2   | -.4378779633  | -1.3485177273 | .8281666354   |
| C4   | -.5518134359  | 1.0253731537  | 1.7331013435  |
| C3   | .2579297113   | -2.3597593851 | -.0476343748  |
| H5   | -1.5313775143 | -1.4835090894 | .7168281942   |
| H3   | -.1575348375  | -3.3918981398 | -.0088344615  |
| H6   | -.2115228192  | -1.6451133345 | 1.8779088028  |
| O1   | 1.2493844281  | -2.1244450446 | -.7542229470  |
| H4   | -.2507006711  | 2.0709409476  | 1.5587322049  |
| H7   | -.1383661011  | .7021496065   | 2.7078339629  |
| H8   | -1.6544784047 | .9989492013   | 1.8035959522  |
| C5   | .8321359450   | .8948981326   | -2.0979512743 |
| H1   | 1.3505918670  | -.0733046084  | -2.1275631388 |
| H9   | 1.4812750946  | 1.6782975776  | -1.6784981306 |
| H10  | .5077654210   | 1.1875260712  | -3.1078154088 |

### CH<sub>2</sub>(SCH<sub>3</sub>)(OH)

| atom | x             | y             | z             |
|------|---------------|---------------|---------------|
| O1   | -1.3584430456 | -.7684526807  | -.9885927605  |
| C1   | -1.1669223580 | -.3980863978  | .3912391551   |
| S1   | .6298404180   | -.5088138287  | .9743837152   |
| H3   | -1.7293038533 | -1.0438820671 | 1.0855119393  |
| H4   | -1.5148799645 | .6398655328   | .4641073521   |
| C2   | 1.3889757885  | .8324282658   | -.1222370229  |
| H1   | 2.4768238052  | .7806816598   | .0295171143   |
| H2   | 1.0174912460  | 1.8240569575  | .1781997473   |
| H5   | 1.1459544707  | .6286262079   | -1.1747510761 |
| H6   | -1.0968351005 | -1.7102196581 | -1.1416486845 |

### CH<sub>3</sub>CH(SCH<sub>3</sub>)CH<sub>2</sub>-CHOH

| atom | x            | y            | z             |
|------|--------------|--------------|---------------|
| H1   | -.8548228720 | 1.4580743924 | -2.0185633765 |
| C1   | -.5266419988 | 1.6600377818 | -.9813053896  |
| H2   | .5500108758  | 1.9063154624 | -1.0147868804 |

|     |               |               |               |
|-----|---------------|---------------|---------------|
| C2  | -.7932724509  | .4340166692   | -.1007108606  |
| H4  | -1.0697696334 | 2.5415454602  | -.6038588318  |
| C3  | -.0833009771  | -.7944459629  | -.5724733585  |
| H5  | -1.8787241232 | .2484800132   | -.0328982027  |
| S1  | -.3961270900  | .8399729124   | 1.7649858934  |
| H10 | -1.6923271961 | -2.1914341834 | -.3462048347  |
| H7  | .9610212625   | -.6946435290  | -.8865689155  |
| C4  | -.6541001739  | -2.0026099548 | -.6386428302  |
| O1  | .0723090139   | -3.1141968647 | -1.0921608491 |
| H8  | -.4625463650  | -3.9393189313 | -1.0843166796 |
| C5  | 1.4925582329  | .8087869835   | 1.7644451528  |
| H3  | 1.9013627367  | 1.5508365270  | 1.0621616229  |
| H6  | 1.8617574208  | -.1991912947  | 1.5251472387  |
| H9  | 1.7944575488  | 1.0762946281  | 2.7881635700  |

### CH<sub>2</sub>=CHSH

| atom | x             | y             | z            |
|------|---------------|---------------|--------------|
| H6   | 1.6180706808  | 0.6685687303  | 0.0000000000 |
| C1   | -0.1950685725 | 1.7856696860  | 0.0000000000 |
| H2   | -1.2901957624 | 1.7938684140  | 0.0000000000 |
| C2   | 0.5249283950  | 0.6585051116  | 0.0000000000 |
| H4   | 0.3064499268  | 2.7581160597  | 0.0000000000 |
| S1   | -0.0982469792 | -1.0579668359 | 0.0000000000 |
| H3   | -1.4451387079 | -0.7601630062 | 0.0000000000 |

### CH<sub>3</sub>CH<sub>2</sub>SH

| atom | x             | y             | z             |
|------|---------------|---------------|---------------|
| H13  | -1.6065832498 | -0.3684773299 | -0.0795228575 |
| H14  | -0.6048182493 | -0.3140993811 | 1.3942471169  |
| H12  | 1.4698330273  | -1.7002989100 | 0.2903335952  |
| H11  | 0.1338635377  | 0.9928420821  | -1.3285741035 |
| C6   | -0.5735774356 | -0.2851188839 | 0.2938390849  |
| C5   | 0.1115588752  | 0.9748996734  | -0.2256638067 |
| S1   | 0.2421858630  | -1.9060300455 | -0.3077677648 |
| H1   | -0.4317926962 | 1.8733185231  | 0.1241351373  |
| H8   | 1.1519816464  | 1.0509503321  | 0.1386886405  |

### CH<sub>3</sub>CH(SH)(SH)

| atom | x             | y             | z             |
|------|---------------|---------------|---------------|
| S2   | -0.7476214663 | -0.3377041587 | 1.8949149645  |
| H12  | 1.4053448526  | -1.7201314921 | -0.3066611613 |
| H14  | 0.6066885868  | -0.2228227209 | 2.1440450074  |
| C6   | -0.6107035007 | -0.3227879132 | -0.0039196739 |
| S1   | 0.1091312416  | -1.9248053881 | -0.7390761668 |
| C1   | 0.0914505625  | 0.9260304308  | -0.5274856961 |
| H13  | -1.6614682711 | -0.3528446894 | -0.3285072120 |
| H1   | 1.1483361598  | 0.9616234661  | -0.2051646880 |
| H2   | -0.4115272635 | 1.8330565210  | -0.1502993709 |
| H3   | 0.0710147206  | 0.9411084962  | -1.6308064495 |

### CH<sub>3</sub>CH(SH)CH<sub>2</sub>CH=O

| atom | x             | y             | z             |
|------|---------------|---------------|---------------|
| S1   | -.3491866193  | .7093986503   | -1.8769943614 |
| C1   | .2233976944   | .4243148671   | -.0553940331  |
| H2   | 1.3100919658  | .2560882928   | -.1078074265  |
| C2   | -.4560043662  | -.8627518806  | .4247385591   |
| C4   | -.1056730908  | 1.6368477591  | .8160865543   |
| C3   | .1897138529   | -2.1467545678 | -.0470380661  |
| H5   | -1.5316542867 | -.8781663495  | .1635436044   |
| H3   | -.4351662634  | -3.0628813451 | .0470354677   |
| H6   | -.4258886412  | -.8963066878  | 1.5365641072  |
| O1   | 1.3496095896  | -2.2328254586 | -.4720792779  |
| H4   | .3661707804   | 2.5521319893  | .4210858212   |
| H7   | .2700691556   | 1.4790701438  | 1.8459497487  |
| H8   | -1.1949737184 | 1.8117148193  | .8636927855   |
| H1   | .7120452165   | 1.5004869131  | -2.2627084648 |

### CH<sub>2</sub>(SH)(OH)

| atom | x             | y             | z             |
|------|---------------|---------------|---------------|
| O1   | -.5628520945  | .0254615793   | -1.2129255205 |
| C1   | -.4884211807  | -.0689065435  | .2169056232   |
| S1   | 1.2913236742  | -.0655261064  | .9007716537   |
| H3   | -.9253064077  | -1.0010348411 | .6102346682   |
| H4   | -1.0301221978 | .8029305674   | .5989345385   |
| H2   | 1.6189741307  | 1.2027805577  | .4689486801   |
| H1   | -.1191559886  | -.7438891014  | -1.6486819065 |

### CH<sub>3</sub>CH(SH)CH<sub>2</sub>CHOH

| atom | x             | y             | z             |
|------|---------------|---------------|---------------|
| H1   | -.3281061493  | 1.5525604776  | -1.6567216558 |
| C1   | -.0339298382  | 1.7670152628  | -.6123892785  |
| H2   | 1.0602115675  | 1.9251307249  | -.5952654642  |
| C2   | -.4395064105  | .5995439301   | .2936640397   |
| H4   | -.5205565900  | 2.7030379866  | -.2944299169  |
| C3   | .2018785309   | -.6989366430  | -.0774928626  |
| H5   | -1.5369109739 | .4931237842   | .3075125222   |
| S1   | -.0848379180  | 1.0576515271  | 2.1589800526  |
| H10  | -1.5672128129 | -1.9191273191 | -.1678806373  |
| H7   | 1.2941395077  | -.6929929712  | -.1950165948  |
| C4   | -.4841540035  | -1.8364401206 | -.2669686401  |
| O1   | .0491164834   | -3.0790011751 | -.6114277765  |
| H3   | 1.0345743118  | -3.0616582300 | -.6832563559  |
| H6   | 1.2717293325  | 1.2642331532  | 1.9990469479  |

### CH<sub>2</sub>=S

| atom | x           | y            | z            |
|------|-------------|--------------|--------------|
| H4   | .0000000000 | .9309562253  | 1.7096815052 |
| C1   | .0000000000 | .0000000000  | 1.1267377652 |
| S1   | .0000000000 | .0000000000  | -.5306810742 |
| H3   | .0000000000 | -.9309562253 | 1.7096815052 |

### CH<sub>3</sub>SSSCH<sub>3</sub>

| atom | x            | y            | z             |
|------|--------------|--------------|---------------|
| S3   | -.8839817714 | -.7311694000 | .0000000000   |
| H6   | .5886230672  | 2.0801367642 | 1.3933516407  |
| S2   | .3966475796  | -.3730080835 | 1.8327069689  |
| C2   | .0989176380  | 1.4684627331 | 2.1635949982  |
| S4   | .3966475796  | -.3730080835 | -1.8327069689 |
| C1   | .0989176380  | 1.4684627331 | -2.1635949982 |
| H1   | .5587711743  | 1.6659225867 | -3.1456508770 |
| H3   | .5886230672  | 2.0801367642 | -1.3933516407 |
| H4   | -.9796651301 | 1.6740788259 | -2.2072376283 |
| H2   | .5587711743  | 1.6659225867 | 3.1456508770  |
| H5   | -.9796651301 | 1.6740788259 | 2.2072376283  |

#### 7. Identification of the products:

The identification of the products done by using a GC-MS. Since these reactions were studied and their chemistry is relatively established we choose to present some representative reactions (short time reactions, low conversions) with H<sub>2</sub>S or CH<sub>3</sub>SH, in order to be able to see some of the intermediate species that are important for the isotope exchange.

Fig. 1S shows the reaction the GC/MS for products of the reaction between Butanal and H<sub>2</sub>S at pH 8-9 at aqueous conditions according to method 1. The reaction products consist of: **1**, **2**, **3**, and **4** which give a clue for the mechanism involved as shown in Scheme 1. Detailed discussions on the mechanism and products were published elsewhere<sup>1-7</sup>.

Fig. 1S

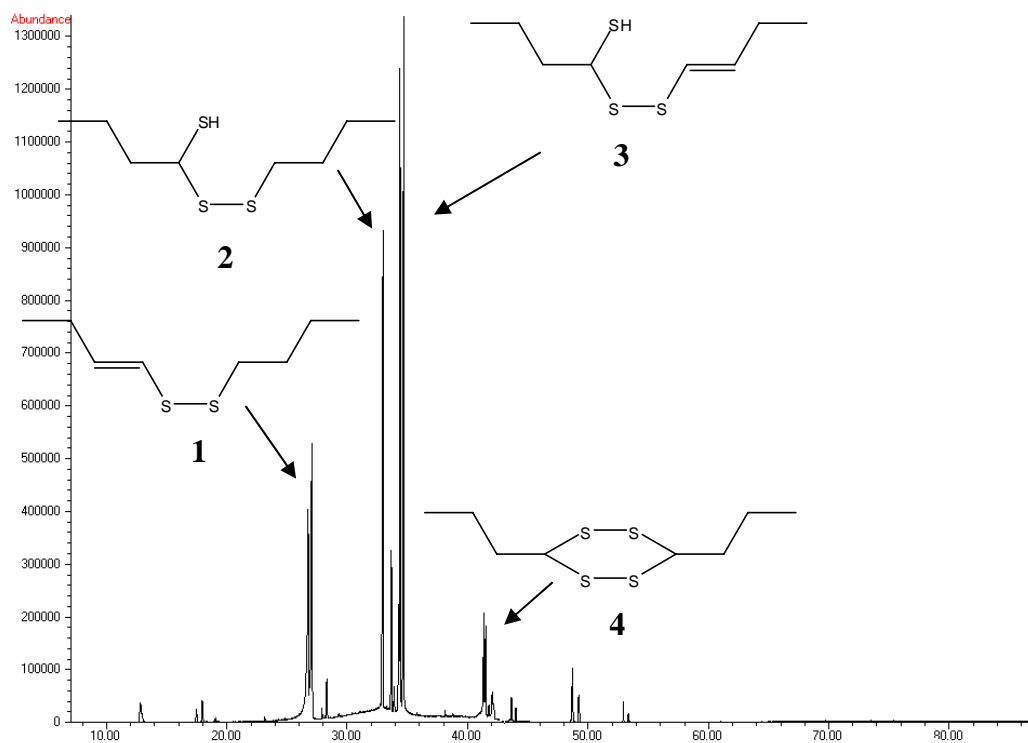

Fig 2S. GC-MS trace for the reaction products of octanal and  $\text{CH}_3\text{SNa}$  under aqueous conditions (Method 3) demonstrating the formation of the gem-disulfide **6**. Other trace quantities products include some intermediates such as **5**.

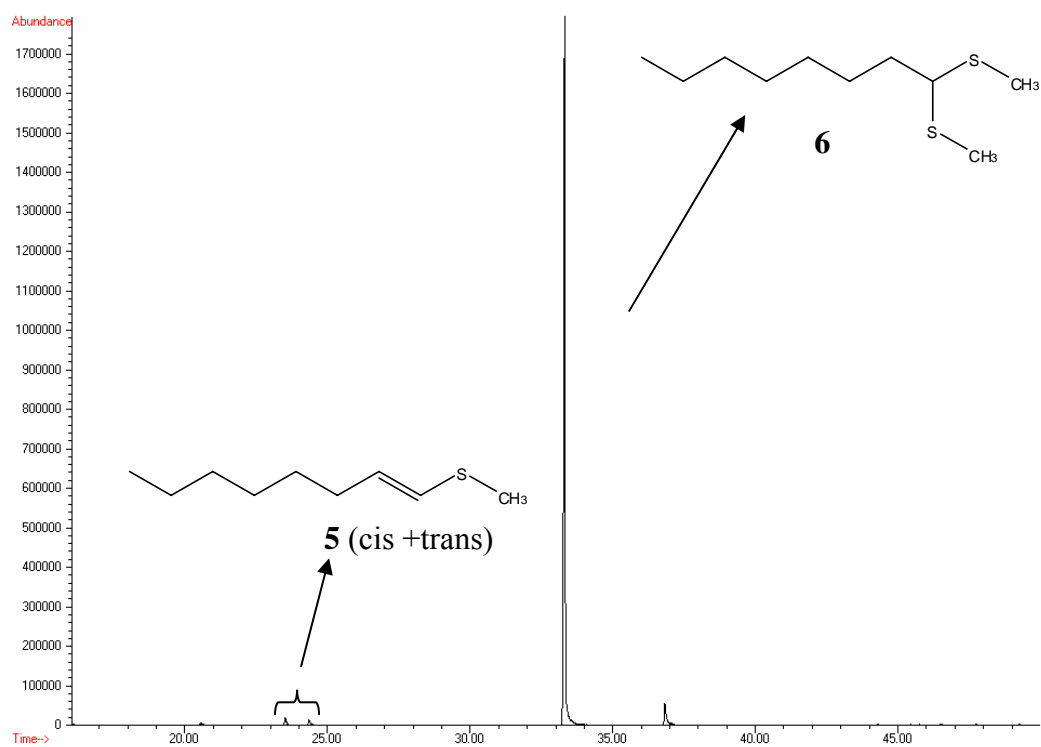

Fig. 3S . GC-MS trace for the reaction products of 2-octenal and  $\text{CH}_3\text{SNa}$  under aqueous conditions (Method 3) demonstrating the predominance of the Michael addition adduct **7**.



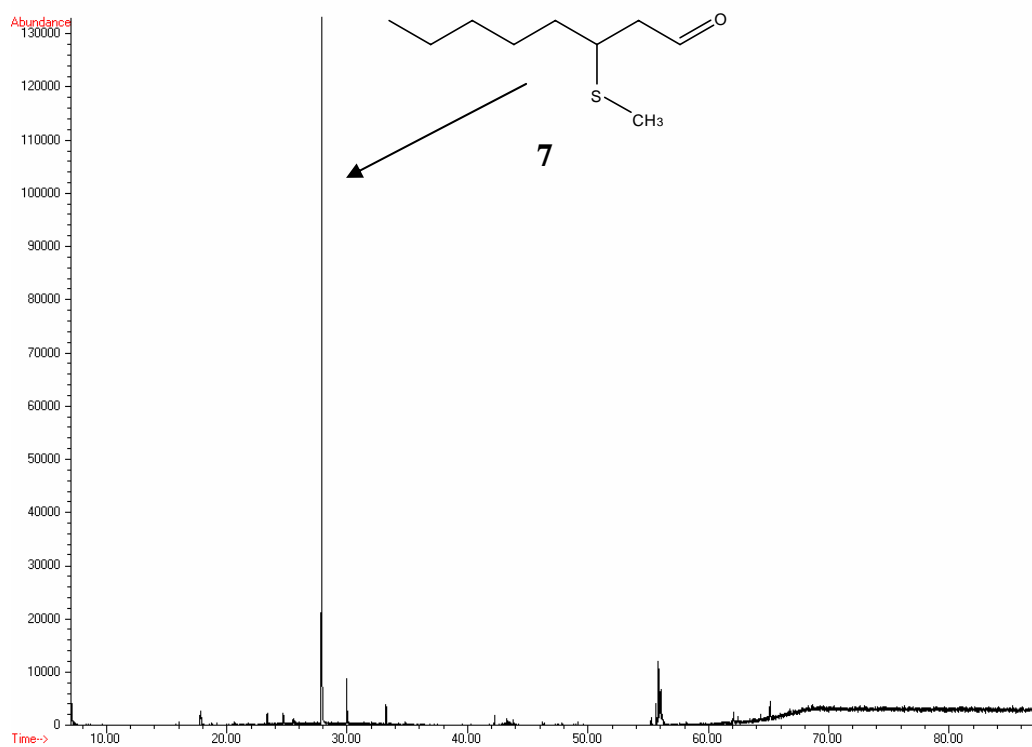

Fig. 4S . GC-MS trace for the reaction products of 2-octenal and  $\text{HS}^-$  under aqueous conditions (Method 3) demonstrating the predominance of the Michael addition adduct **8**.

| Molecule                                               | $E_0$<br>(Hartree) | $E_0$<br>(kcal/mol) | ZPE<br>(kcal/mol) | $E_{sol}$<br>(kcal/mol) | $\delta G_{T=20C}$<br>(kcal/mol) | $\Delta G_{T=20C}$<br>(kcal/mol) | $\Delta\Delta G$<br>(kcal/mol) | $\delta(\Delta\Delta G)$<br>(cal/mol) | $k_i/k_0$ | $R_i \cdot R_0$<br>(per mil) |        |    |       |     |        |      |
|--------------------------------------------------------|--------------------|---------------------|-------------------|-------------------------|----------------------------------|----------------------------------|--------------------------------|---------------------------------------|-----------|------------------------------|--------|----|-------|-----|--------|------|
| CH <sub>3</sub> S-<br>CH <sub>3</sub> <sup>34</sup> S- | -438               | 125028              | 274028            | 18                      | 22                               | 2572                             | 72                             | 8204                                  | 14        | 57660                        | 274002 | 22 | 0.058 | 3.9 | 0.9933 | -6.7 |
| HS-<br>H <sup>34</sup> S-                              | -39                |                     |                   |                         |                                  |                                  |                                |                                       |           |                              |        |    |       | 4.1 | 0.9930 | -7.0 |

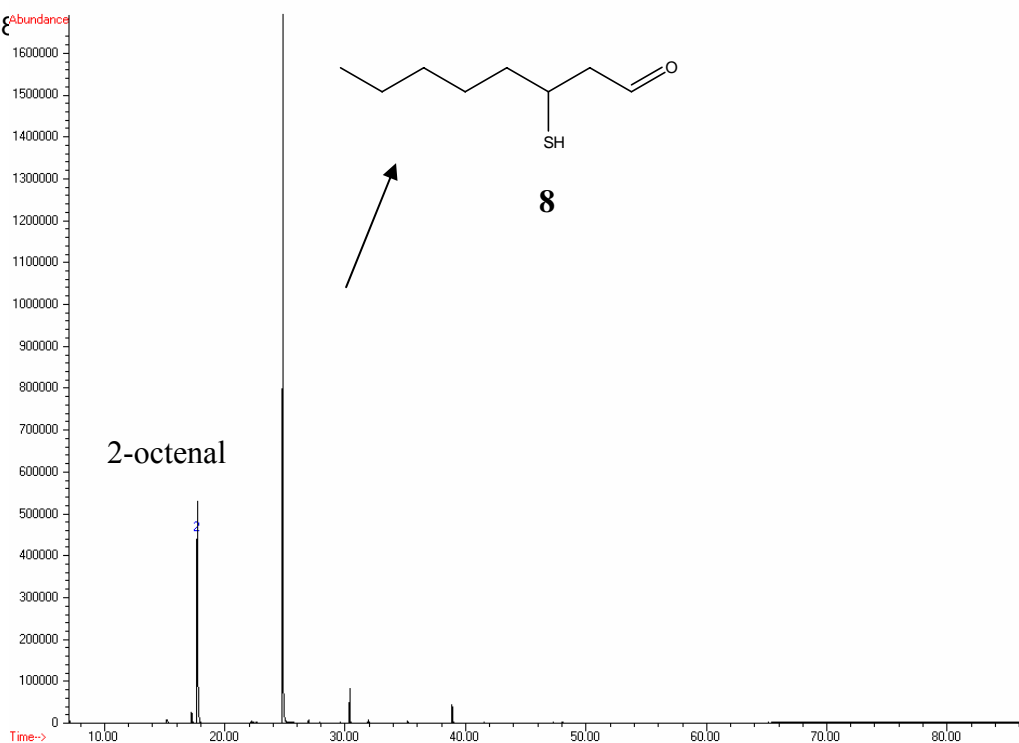

## Additional data for the protonation effect of MeSH and H<sub>2</sub>S

### Final coordinates:

#### HS<sup>-</sup>

| atom | x            | y            | z             |
|------|--------------|--------------|---------------|
| H1   | 0.0000000000 | 0.0000000000 | 1.3491275168  |
| S1   | 0.0000000000 | 0.0000000000 | -0.0425272575 |

#### CH<sub>3</sub>S<sup>-</sup>

| atom | x             | y             | z             |
|------|---------------|---------------|---------------|
| H1   | -0.3754893042 | 1.7065428089  | 0.8963401365  |
| C1   | 0.1070125404  | 1.2699469338  | 0.0000000000  |
| H2   | -0.3754893042 | 1.7065428089  | -0.8963401365 |
| S1   | -0.0534214534 | -0.6339080466 | 0.0000000000  |
| H4   | 1.1715317658  | 1.5758653526  | 0.0000000000  |

References:

1. A. Amrani, J. W. Turner, Q. Ma, Y. Tang and P.G. Hatcher, *Geochimica et Cosmochimica Acta*, 2007, In press, available online.
2. P. Schneckenburger, P. Adam and P. Albrecht, *Tetrahedron Letters*, 1998, **39**, 447-450.
3. A. Amrani and Z. Aizenshtat, *Organic Geochemistry*, 2004, **35**, 1319.
4. A. Amrani and Z. Aizenshtat, *Organic Geochemistry*, 2004, **35**, 909.
5. E. B. Krein and Z. Aizenshtat, in *ACS Symposium Series, vol.612*, eds. M. A. Vairavamurthy, M. A. A. Schoonen, T. I. Eglinton, G. W. Luther, III and B. Manowitz, American Chemical Society, Washington, Editon edn., 1995, pp. 110-137.
6. E. B. Krein and Z. Aizenshtat, *Journal Of Organic Chemistry*, 1993, **58**, 6103-6108.
7. A. R. Loch, K. A. Lippa, D. L. Carlson, Y. P. Chin, S. J. Traina and A. L. Roberts, *Environmental Science & Technology*, 2002, **36**, 4065-4073.
